# Supplementary material for: El rincón de Schering: Uso de Antibióticos en el cebo de terneros
Source: Royal Society of Chemistry journal article supplement (doi:10.1039/c5dt04038h), 2006-01-01
Supplement: c5dt04038h1.pdf [file c5dt04038h1.pdf]

## Electronic Supplementary Information

# En route to phosphonato iridium(I) complexes: the decisive effect of an intramolecular hydrogen bond

Vincenzo Passarelli,<sup>\*a,b</sup> Jesús J. Pérez–Torrente<sup>b</sup> and Luis A. Oro<sup>b</sup>

<sup>a</sup> Centro Universitario de la Defensa, Ctra. Huesca s/n, ES–50090 Zaragoza, Spain.

<sup>b</sup> Departamento de Química Inorgánica, Instituto de Síntesis Química y Catálisis Homogénea (ISQCH),  
Universidad de Zaragoza–CSIC, C/ Pedro Cerbuna 12, ES–50009 Zaragoza, Spain.

|                                                                                                                                    |    |
|------------------------------------------------------------------------------------------------------------------------------------|----|
| 1. Selected NMR data of IrCl(SiNP)(tfbb) ( <b>1</b> )                                                                              | 1  |
| 2. Selected NMR and kinetic data of [Ir(SiNP){P(OMe) <sub>3</sub> }(tfbb)] <sup>+</sup> ( <b>3</b> <sup>+</sup> )                  | 2  |
| 3. Selected bond lengths and angles of the calculated structure of IrCl(SiNP)(tfbb) ( <b>1</b> )                                   | 3  |
| 4. Selected bond lengths and angles of the calculated structure of IrCl(HNP) <sub>2</sub> (tfbb) ( <b>2</b> )                      | 4  |
| 5. Selected bond lengths and angles of the calculated structure of Ir(SiNP){P(OMe) <sub>3</sub> }(tfbb) ( <b>3</b> <sup>+</sup> )  | 5  |
| 6. Selected bond lengths and angles of the calculated structure of Ir{PO(OMe) <sub>2</sub> }(HNP) <sub>2</sub> (tfbb) ( <b>4</b> ) | 6  |
| 7. Atomic coordinates of the calculated structures                                                                                 | 7  |
| i. IrCl(SiNP)(tfbb) ( <b>1</b> )                                                                                                   | 7  |
| ii. IrCl(HNP) <sub>2</sub> (tfbb) ( <b>2</b> )                                                                                     | 8  |
| iii. Ir(SiNP){P(OMe) <sub>3</sub> }(tfbb) ( <b>3</b> <sup>+</sup> )                                                                | 9  |
| iv. Ir{PO(OMe) <sub>2</sub> }(HNP) <sub>2</sub> (tfbb) ( <b>4</b> )                                                                | 10 |
| v. Ir(HNP) <sub>2</sub> {P(OMe) <sub>3</sub> }(tfbb) ( <b>5</b> <sup>+</sup> )                                                     | 11 |
| vi. Ir{PO(OMe) <sub>2</sub> }(SiNP) <sub>2</sub> (tfbb) ( <b>3–Me</b> )                                                            | 12 |
| vii. <b>TS_5<sup>+</sup>_4</b>                                                                                                     | 13 |
| viii. <b>TS_3<sup>+</sup>_3–Me</b>                                                                                                 | 14 |

## 1. Selected NMR data of IrCl(SiNP)(tfbb) (1)

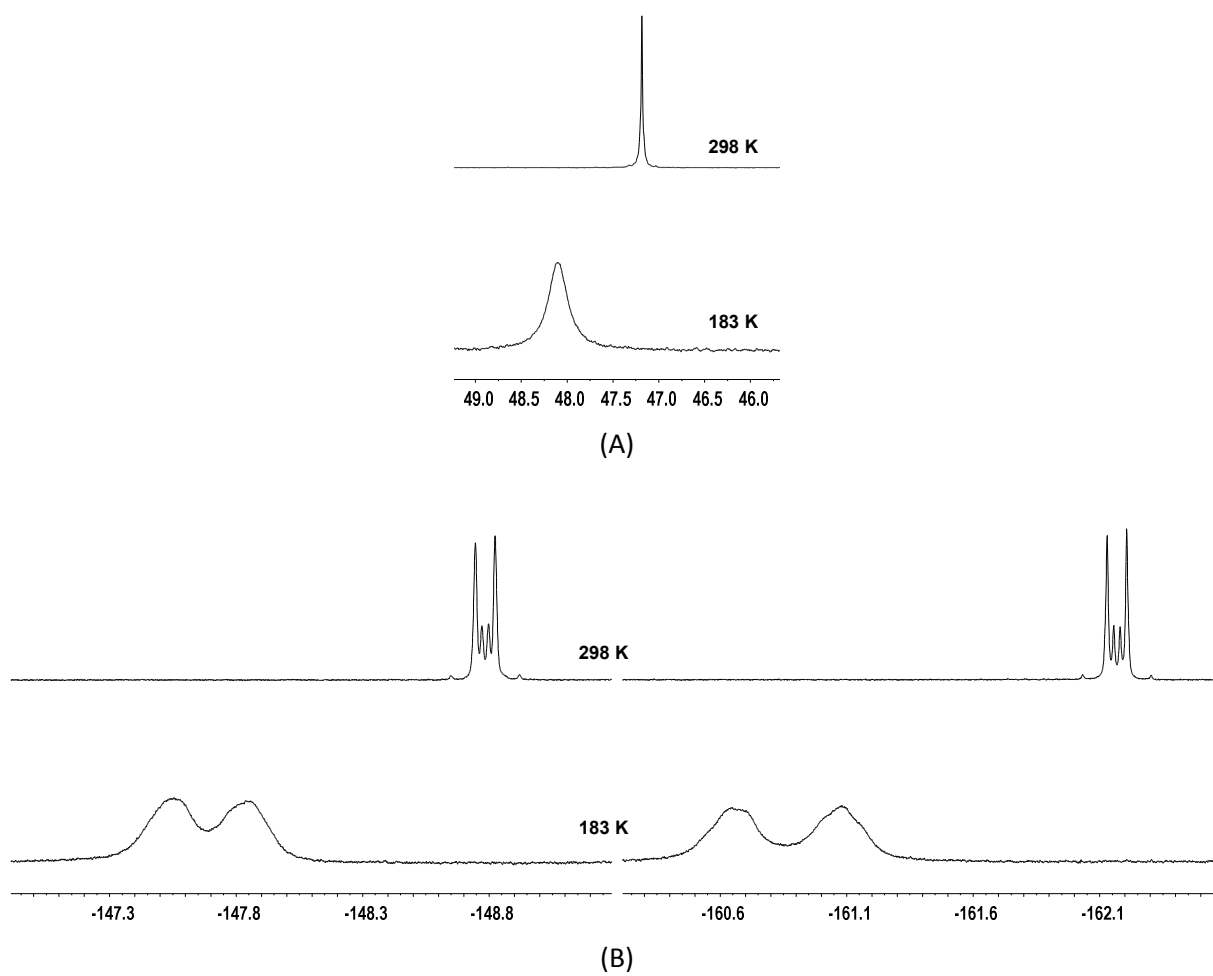

**Figure S1.** Selected regions of the NMR spectra of IrCl(SiNP)(tfbb) (1) (A,  $^{31}\text{P}\{^1\text{H}\}$ ; B,  $^{19}\text{F}$ ) at 183 K and 298 K.

## 2. Selected NMR and kinetic data of $[\text{Ir}(\text{SiNP})\{\text{P}(\text{OMe})_3\}(\text{tfbb})]^+ (3^+)$

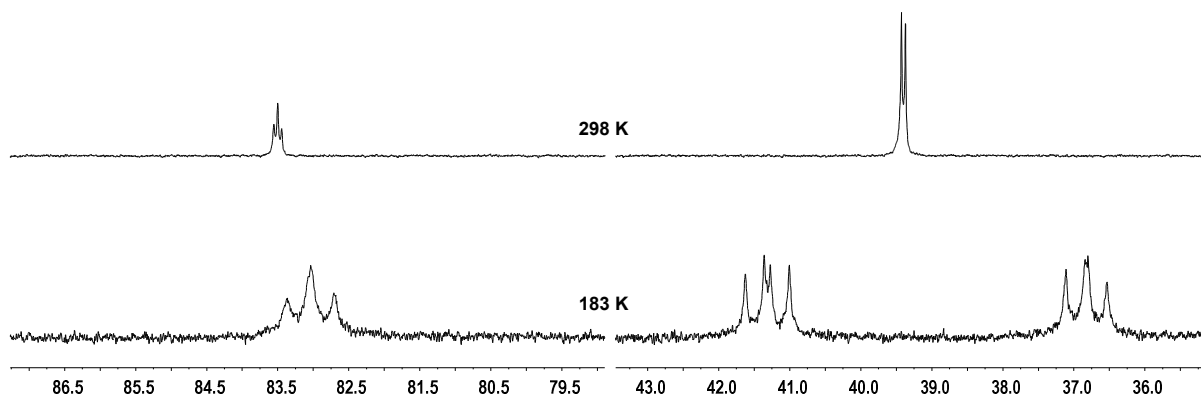

**Figure S2.** Selected regions of the  $^{31}\text{P}\{^1\text{H}\}$  NMR spectrum ( $\text{CD}_2\text{Cl}_2$ ) of  $[\text{Ir}(\text{SiNP})\{\text{P}(\text{OMe})_3\}(\text{tfbb})]\text{Cl}$  (**[3]Cl**) at 183 K and 298 K.

**Table S1.** Kinetic constants and activation parameters for the observed dynamics of **[3]Cl** (in  $\text{CD}_2\text{Cl}_2$ ).

$$\Delta H_{\text{act}} = 48.1 \pm 0.5 \text{ kJ} \cdot \text{mol}^{-1}$$

$$\Delta S_{\text{act}} = 48.0 \pm 2.5 \text{ J} \cdot \text{mol}^{-1} \cdot \text{K}^{-1}$$

| T (K) | k ( $\text{sec}^{-1}$ ) |
|-------|-------------------------|
| 183   | $3.00 \cdot 10^1$       |
| 193   | $1.00 \cdot 10^2$       |
| 203   | $4.50 \cdot 10^2$       |
| 213   | $2.50 \cdot 10^3$       |
| 223   | $8.00 \cdot 10^3$       |
| 233   | $2.90 \cdot 10^4$       |

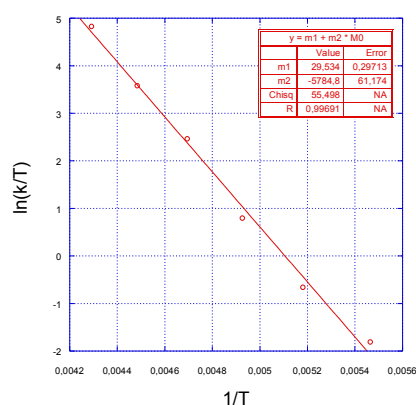

**Figure S3.** Eyring plot for the left-right exchange at the SiNP ligand in **[3]Cl** ( $\text{CD}_2\text{Cl}_2$ ).

### 3. Selected bond lengths and angles of the calculated structure of IrCl(SiNP)(tfbb) (1)

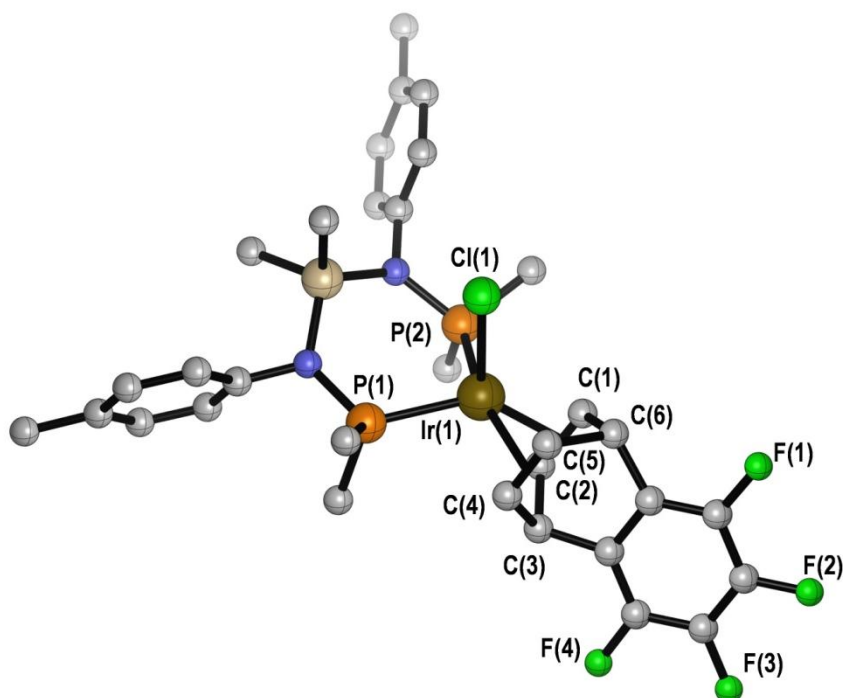

**Figure S4.** View of the DFT–B3LYP calculated structure of IrCl(SiNP)(tfbb) (1) (CH<sub>2</sub>Cl<sub>2</sub>, 298 K) with the numbering scheme adopted. Most hydrogen atoms are omitted and only *ipso* carbon atoms are shown for clarity.

**Table S2.** Selected bond lengths (Å) and angles (°) of the DFT-B3LYP calculated structure of IrCl(SiNP)(tfbb) (1).\*

|               |       |                       |        |
|---------------|-------|-----------------------|--------|
| Ir(1)–C(1)    | 2.127 | P(1)–Ir(1)–P(2)       | 95.48  |
| Ir(1)–C(2)    | 2.118 | P(1)–Ir(1)–Cl(1)      | 94.24  |
| Ir(1)–ct[1–2] | 1.993 | P(2)–Ir(1)–Cl(1)      | 90.13  |
| Ir(1)–C(4)    | 2.297 | ct[1–2]–Ir(1)–P(1)    | 138.45 |
| Ir(1)–C(5)    | 2.280 | ct[4–5]–Ir(1)–P(1)    | 99.00  |
| Ir(1)–ct[4–5] | 2.181 | ct[1–2]–Ir(1)–P(2)    | 96.98  |
| C(1)–C(2)     | 1.458 | ct[4–5]–Ir(1)–P(2)    | 163.75 |
| C(4)–C(5)     | 1.387 | ct[1–2]–Ir(1)–Cl(1)   | 125.13 |
| Ir(1)–P(1)    | 2.373 | ct[4–5]–Ir(1)–Cl(1)   | 96.09  |
| Ir(1)–P(2)    | 2.315 | ct[1–2]–Ir(1)–ct[4–5] | 67.20  |
| Ir(1)–Cl(1)   | 2.576 |                       |        |

\* ct[X–Y]: centroid of the C(X)–C(Y) bond.

#### 4. Selected bond lengths and angles of the calculated structure of IrCl(HNP)<sub>2</sub>(tfbb) (2)

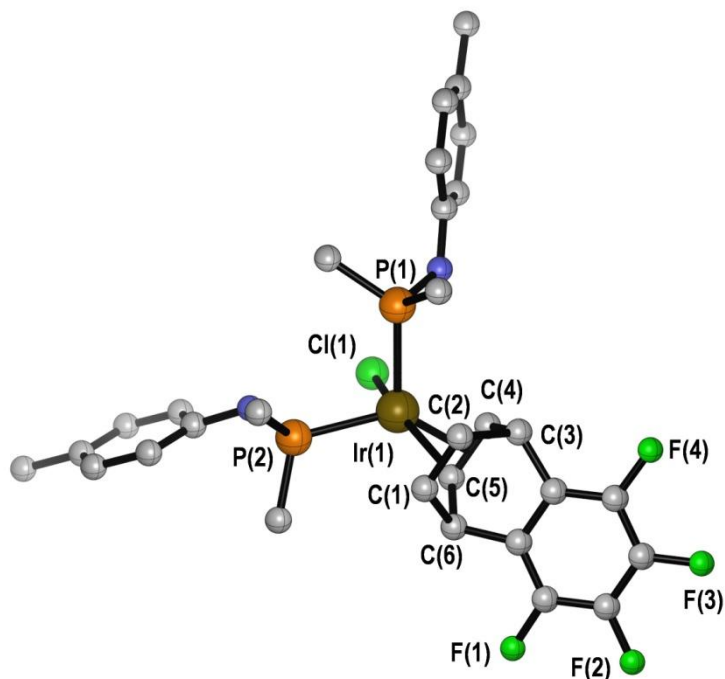

**Figure S5.** View of the DFT–B3LYP calculated structure of IrCl(HNP)<sub>2</sub>(tfbb) (**2**) (CH<sub>2</sub>Cl<sub>2</sub>, 298 K) with the numbering scheme adopted. Most hydrogen atoms are omitted and only *ipso* carbon atoms are shown for clarity.

**Table S3.** Selected bond lengths (Å) and angles (°) of the DFT-B3LYP calculated structure of IrCl(HNP)<sub>2</sub>(tfbb) (**2**).\*

|               |       |                       |        |
|---------------|-------|-----------------------|--------|
| Ir(1)–C(1)    | 2.191 | P(1)–Ir(1)–P(2)       | 99.99  |
| Ir(1)–C(2)    | 2.176 | P(1)–Ir(1)–Cl(1)      | 87.33  |
| Ir(1)–ct[1–2] | 2.066 | P(2)–Ir(1)–Cl(1)      | 91.33  |
| Ir(1)–C(4)    | 2.121 | ct[1–2]–Ir(1)–P(1)    | 107.49 |
| Ir(1)–C(5)    | 2.128 | ct[4–5]–Ir(1)–P(1)    | 123.41 |
| Ir(1)–ct[4–5] | 1.997 | ct[1–2]–Ir(1)–P(2)    | 101.39 |
| C(1)–C(2)     | 1.413 | ct[4–5]–Ir(1)–P(2)    | 136.58 |
| C(4)–C(5)     | 1.451 | ct[1–2]–Ir(1)–Cl(1)   | 158.20 |
| Ir(1)–P(1)    | 2.462 | ct[4–5]–Ir(1)–Cl(1)   | 89.92  |
| Ir(1)–P(2)    | 2.404 | ct[1–2]–Ir(1)–ct[4–5] | 68.66  |
| Ir(1)–Cl(1)   | 2.466 |                       |        |

\* ct[X–Y]: centroid of the C(X)–C(Y) bond.

## 5. Selected bond lengths and angles of the calculated structure of $[\text{Ir}(\text{SiNP})\{\text{P}(\text{OMe})_3\}(\text{tfbb})]^+$ ( $3^+$ )

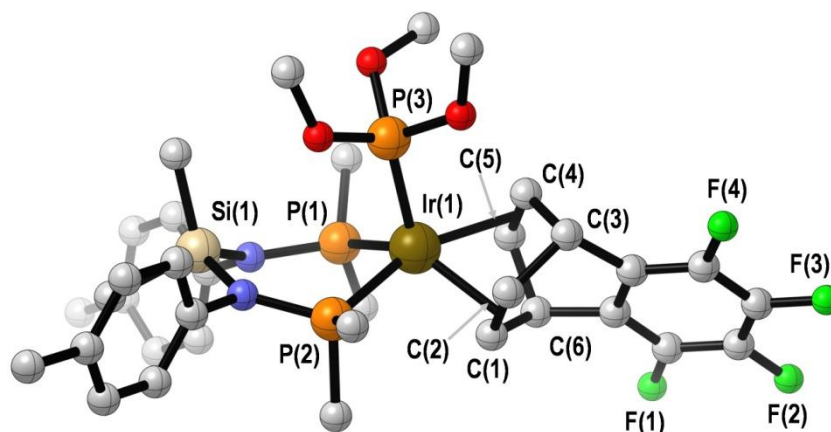

**Figure S6.** View of the DFT-B3LYP calculated structure of  $[\text{Ir}(\text{SiNP})\{\text{P}(\text{OMe})_3\}(\text{tfbb})]^+$  ( $3^+$ ) ( $\text{CH}_2\text{Cl}_2$ , 298 K) with the numbering scheme adopted. Most hydrogen atoms are omitted and only *ipso* carbon atoms are shown for clarity.

**Table S4.** Selected bond lengths (Å) and angles ( $^\circ$ ) of the DFT-B3LYP calculated structure of  $[\text{Ir}(\text{SiNP})\{\text{P}(\text{OMe})_3\}(\text{tfbb})]^+$  ( $3^+$ ).\*

|               |       |                       |        |
|---------------|-------|-----------------------|--------|
| Ir(1)–C(1)    | 2.165 | P(1)–Ir(1)–P(2)       | 94.59  |
| Ir(1)–C(2)    | 2.148 | P(1)–Ir(1)–P(3)       | 102.96 |
| Ir(1)–ct[1-2] | 2.031 | P(2)–Ir(1)–P(3)       | 95.72  |
| Ir(1)–C(4)    | 2.340 | ct[1-2]–Ir(1)–P(1)    | 129.67 |
| Ir(1)–C(5)    | 2.348 | ct[4-5]–Ir(1)–P(1)    | 98.62  |
| Ir(1)–ct[4-5] | 2.239 | ct[1-2]–Ir(1)–P(2)    | 93.28  |
| C(1)–C(2)     | 1.448 | ct[4-5]–Ir(1)–P(2)    | 158.62 |
| C(5)–C(4)     | 1.387 | ct[1-2]–Ir(1)–P(3)    | 125.54 |
| Ir(1)–P(1)    | 2.436 | ct[4-5]–Ir(1)–P(3)    | 97.60  |
| Ir(1)–P(2)    | 2.355 | ct[4-5]–Ir(1)–ct[1-2] | 65.36  |
| Ir(1)–P(3)    | 2.339 |                       |        |

\* ct[X–Y]: centroid of the C(X)–C(Y) bond.

## 6. Selected bond lengths and angles of the calculated structure of $\text{Ir}\{\text{PO}(\text{OMe})_2\}(\text{SiNP})(\text{tfbb})$ (**4**)

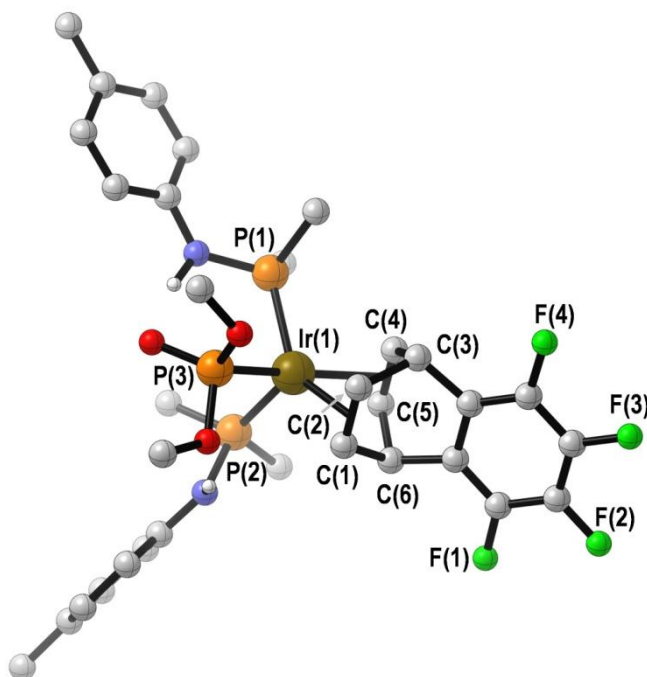

**Figure S7.** View of the DFT-B3LYP calculated structure of  $\text{Ir}\{\text{PO}(\text{OMe})_2\}(\text{SiNP})(\text{tfbb})$  (**4**) ( $\text{CH}_2\text{Cl}_2$ , 298 K) with the numbering scheme adopted. Most hydrogen atoms are omitted and only *ipso* carbon atoms are shown for clarity.

**Table S5.** Selected bond lengths (Å) and angles (°) of the DFT-B3LYP calculated structure of  $\text{Ir}\{\text{PO}(\text{OMe})_2\}(\text{SiNP})(\text{tfbb})$  (**4**).\*

|                                      |       |                                                            |        |
|--------------------------------------|-------|------------------------------------------------------------|--------|
| $\text{Ir}(1)\text{-C}(1)$           | 2.143 | $\text{P}(1)\text{-Ir}(1)\text{-P}(2)$                     | 100.46 |
| $\text{Ir}(1)\text{-C}(2)$           | 2.160 | $\text{P}(1)\text{-Ir}(1)\text{-P}(3)$                     | 91.56  |
| $\text{Ir}(1)\text{-ct}[1\text{-}2]$ | 2.027 | $\text{P}(2)\text{-Ir}(1)\text{-P}(3)$                     | 93.49  |
| $\text{Ir}(1)\text{-C}(4)$           | 2.317 | $\text{ct}[1\text{-}2]\text{-Ir}(1)\text{-P}(1)$           | 139.62 |
| $\text{Ir}(1)\text{-C}(5)$           | 2.305 | $\text{ct}[4\text{-}5]\text{-Ir}(1)\text{-P}(1)$           | 97.78  |
| $\text{Ir}(1)\text{-ct}[4\text{-}5]$ | 2.204 | $\text{ct}[1\text{-}2]\text{-Ir}(1)\text{-P}(2)$           | 119.38 |
| $\text{C}(1)\text{-C}(2)$            | 1.446 | $\text{ct}[4\text{-}5]\text{-Ir}(1)\text{-P}(2)$           | 106.82 |
| $\text{C}(4)\text{-C}(5)$            | 1.391 | $\text{ct}[1\text{-}2]\text{-Ir}(1)\text{-P}(3)$           | 92.29  |
| $\text{Ir}(1)\text{-P}(1)$           | 2.397 | $\text{ct}[4\text{-}5]\text{-Ir}(1)\text{-P}(3)$           | 155.57 |
| $\text{Ir}(1)\text{-P}(2)$           | 2.436 | $\text{ct}[1\text{-}2]\text{-Ir}(1)\text{-ct}[4\text{-}5]$ | 66.14  |
| $\text{Ir}(1)\text{-P}(3)$           | 2.313 |                                                            |        |

\*  $\text{ct}[X\text{-}Y]$ : centroid of the  $\text{C}(X)\text{-C}(Y)$  bond.

## 7. Atomic coordinates of the calculated structures

**IrCl(SiNP)(tfbb) (1)**

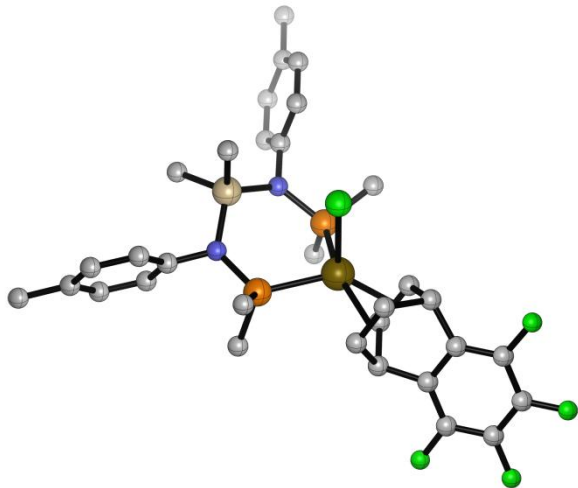

|    |          |          |          |
|----|----------|----------|----------|
| Ir | -0.80391 | 0.15105  | -0.51781 |
| P  | 0.62901  | -1.73156 | -0.33469 |
| N  | 0.71429  | 1.66903  | 0.34878  |
| Si | 3.18486  | 0.06504  | -0.82208 |
| N  | 2.34912  | 1.50425  | -0.16406 |
| N  | 2.34405  | -1.43332 | -0.33595 |
| C  | 3.896    | 3.10078  | 0.94725  |
| H  | 3.81023  | 2.53073  | 1.86576  |
| C  | 4.11769  | 4.5713   | -1.40179 |
| H  | 4.18985  | 5.14333  | -2.32367 |
| C  | 3.23977  | -2.54121 | -0.07159 |
| C  | 3.18361  | 2.69109  | -0.1864  |
| C  | 3.3016   | 3.44235  | -1.36376 |
| H  | 2.73244  | 3.14309  | -2.23769 |
| C  | 4.8373   | 4.98785  | -0.27332 |
| C  | 3.68946  | -3.38018 | -1.09919 |
| H  | 3.33891  | -3.21854 | -2.11187 |
| C  | 3.70637  | -2.77388 | 1.23043  |
| H  | 3.35787  | -2.13433 | 2.03455  |
| C  | 4.58015  | -4.42088 | -0.82694 |
| H  | 4.91825  | -5.05574 | -1.64234 |
| C  | 3.44366  | 0.17577  | -2.67928 |
| H  | 2.49913  | 0.32083  | -3.20856 |
| H  | 3.92804  | -0.73882 | -3.04094 |
| H  | 4.10775  | 1.0131   | -2.91885 |
| C  | 0.78344  | 1.61135  | 2.20127  |
| C  | 1.78143  | 0.8668   | 2.84664  |
| H  | 2.55699  | 0.39253  | 2.25544  |
| C  | -0.21741 | 2.20954  | 2.98693  |
| H  | -0.99322 | 2.80579  | 2.51743  |
| C  | 1.78837  | 0.72984  | 4.23592  |
| H  | 2.57398  | 0.15287  | 4.71564  |
| C  | 4.90228  | 0.02285  | -0.03713 |
| H  | 5.44838  | 0.93209  | -0.30429 |

|   |          |          |          |
|---|----------|----------|----------|
| H | 5.47297  | -0.83148 | -0.41237 |
| H | 4.87925  | -0.0466  | 1.05431  |
| C | -2.51383 | 1.36419  | -0.16073 |
| C | -2.33229 | 0.40946  | 0.92554  |
| C | -2.56207 | -1.32527 | -0.58945 |
| C | 5.74074  | 6.19707  | -0.33067 |
| H | 5.92331  | 6.60865  | 0.66629  |
| H | 5.30992  | 6.98948  | -0.95082 |
| H | 6.71674  | 5.94338  | -0.76331 |
| C | -2.71282 | -0.41807 | -1.62808 |
| C | 5.05084  | -4.65628 | 0.46997  |
| C | -0.21214 | 2.07044  | 4.37614  |
| H | -0.98965 | 2.54761  | 4.96603  |
| C | 4.70674  | 4.23532  | 0.90045  |
| H | 5.24935  | 4.53802  | 1.79292  |
| C | -4.63805 | -0.46913 | 0.48321  |
| C | -4.8015  | 0.44236  | -0.57741 |
| C | -3.19469 | -0.85669 | 0.72863  |
| C | 4.59848  | -3.81012 | 1.49285  |
| H | 4.94929  | -3.96575 | 2.51035  |
| C | 0.79108  | 1.33056  | 5.00537  |
| H | 0.79674  | 1.22679  | 6.08656  |
| C | -6.0687  | 0.90072  | -0.89978 |
| C | -7.18343 | 0.46426  | -0.17938 |
| C | -7.02132 | -0.43728 | 0.86993  |
| C | 0.33925  | -2.96478 | -1.69407 |
| C | 0.83671  | -2.67023 | -2.97565 |
| H | 1.42921  | -1.77719 | -3.13024 |
| C | 0.3814   | -2.736   | 1.20754  |
| C | -0.3449  | 3.76879  | -1.19828 |
| H | -0.59594 | 2.9808   | -1.90101 |
| C | -0.48215 | -4.09489 | -1.54454 |
| H | -0.89426 | -4.34623 | -0.57335 |
| C | 0.29636  | 3.43968  | 0.00716  |
| C | -0.21795 | -2.10999 | 2.31087  |
| H | -0.53896 | -1.07919 | 2.21192  |
| C | 0.80435  | -4.07057 | 1.34436  |
| H | 1.28483  | -4.57866 | 0.51611  |
| C | 0.64327  | 4.47179  | 0.89497  |
| H | 1.15228  | 4.24617  | 1.82485  |
| C | -0.6387  | 5.09976  | -1.49944 |
| H | -1.13458 | 5.33792  | -2.43615 |
| C | -0.29981 | 6.11724  | -0.6063  |
| H | -0.53418 | 7.15183  | -0.84153 |
| C | -0.40094 | -2.79534 | 3.51385  |
| H | -0.86515 | -2.28935 | 4.35551  |
| C | 0.00806  | -4.12401 | 3.63016  |
| H | -0.14146 | -4.66293 | 4.5617   |
| C | 0.61176  | -4.75881 | 2.54274  |
| H | 0.9394   | -5.79121 | 2.6266   |
| C | 0.34443  | 5.79999  | 0.59037  |
| H | 0.61826  | 6.58526  | 1.28929  |
| C | 5.99779  | -5.79533 | 0.76608  |
| H | 6.53254  | -6.11543 | -0.13276 |
| H | 5.45983  | -6.66912 | 1.15496  |
| H | 6.74014  | -5.51313 | 1.51946  |
| C | -0.77308 | -4.91972 | -2.63466 |
| H | -1.40548 | -5.79169 | -2.49257 |

|    |          |          |          |
|----|----------|----------|----------|
| C  | 0.55181  | -3.49807 | -4.06083 |
| H  | 0.94901  | -3.25036 | -5.04106 |
| C  | -0.25169 | -4.62835 | -3.89446 |
| H  | -0.47549 | -5.27053 | -4.74152 |
| C  | -5.7445  | -0.89975 | 1.19715  |
| C  | -3.49526 | 0.84174  | -1.23183 |
| Cl | -0.03884 | 0.74067  | -2.90617 |
| F  | -8.09265 | -0.857   | 1.558    |
| F  | -5.61814 | -1.76993 | 2.2189   |
| F  | -6.25772 | 1.77306  | -1.90839 |
| H  | -8.4098  | 0.90542  | -0.49243 |
| H  | -2.13068 | 0.7353   | 1.94229  |
| H  | -3.62212 | 1.53122  | -2.06487 |
| H  | -3.07892 | -1.58302 | 1.53181  |
| H  | -2.44603 | 2.43574  | -0.00182 |
| H  | -2.25962 | -2.35253 | -0.74377 |
| H  | -2.4645  | -0.63408 | -2.65972 |



**IrCl(HNP)<sub>2</sub>(tfbb) (2)**

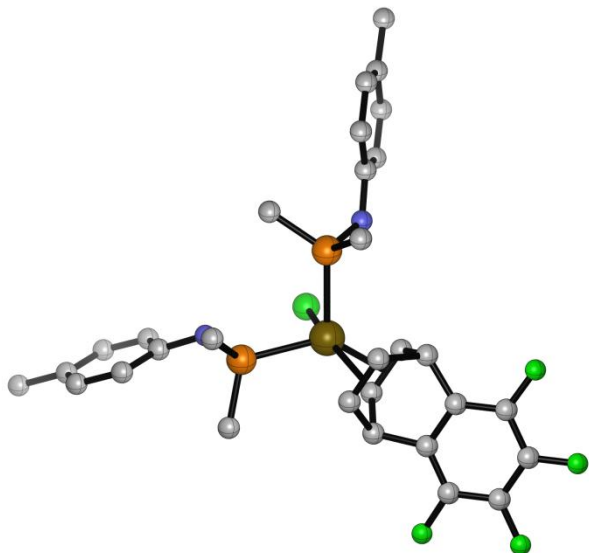

|    |          |          |          |
|----|----------|----------|----------|
| Ir | 0.50028  | -0.16778 | -0.54292 |
| C  | 2.79919  | -1.86093 | -0.6157  |
| P  | -0.4547  | 1.96594  | 0.23005  |
| P  | -1.16283 | -1.69441 | 0.28644  |
| C  | 2.08751  | -1.0098  | -1.68319 |
| C  | 2.00497  | -1.30061 | 0.57469  |
| C  | 2.30516  | 0.41183  | -1.49392 |
| C  | 3.16882  | 0.70048  | -0.24621 |
| C  | 2.20495  | 0.08215  | 0.78643  |
| C  | 4.25629  | -1.47354 | -0.49321 |
| C  | 6.84392  | -0.4537  | -0.25648 |
| C  | 5.74378  | 0.40321  | -0.1752  |
| C  | 4.45581  | -0.09446 | -0.29221 |
| N  | -2.53975 | -1.67112 | -0.71823 |
| N  | -0.20595 | 3.03897  | -1.08701 |
| F  | 5.96631  | 1.71759  | 0.01886  |
| F  | 8.08918  | 0.02781  | -0.14212 |
| F  | 5.18844  | -3.64615 | -0.76325 |
| F  | 7.70295  | -2.63911 | -0.53206 |
| C  | -0.62356 | -3.46953 | 0.29975  |
| C  | -0.68129 | -4.32171 | 1.41051  |
| C  | 5.34887  | -2.32231 | -0.57254 |
| C  | -0.13449 | -3.97805 | -0.91641 |
| C  | -0.24442 | -5.64616 | 1.31321  |
| C  | 0.24024  | -6.13938 | 0.10289  |
| C  | 6.64636  | -1.81833 | -0.45575 |
| C  | 0.28719  | -5.30247 | -1.01574 |
| C  | -1.80133 | -1.40474 | 1.99532  |
| C  | -0.93557 | -1.48719 | 3.10096  |
| C  | -3.1286  | -1.00824 | 2.21151  |
| C  | -3.55801 | -2.62527 | -0.92775 |

|   |          |          |          |
|---|----------|----------|----------|
| C | -3.9733  | -3.54197 | 0.04742  |
| C | -5.67212 | -4.45139 | -1.45556 |
| C | -4.2155  | -2.63352 | -2.1714  |
| C | -3.58419 | -0.72407 | 3.5009   |
| C | -5.25249 | -3.52463 | -2.42144 |
| C | -1.39451 | -1.21104 | 4.38946  |
| C | -2.72355 | -0.83035 | 4.59322  |
| C | -5.00955 | -4.43703 | -0.22486 |
| C | -6.78695 | -5.42902 | -1.74516 |
| C | -2.24493 | 2.19318  | 0.65782  |
| C | 0.45594  | 2.73606  | 1.63604  |
| C | -0.79952 | 4.29022  | -1.37307 |
| C | -0.94502 | 4.66892  | -2.71882 |
| C | -2.71602 | 2.71857  | 1.86915  |
| C | -3.17866 | 1.82459  | -0.32679 |
| C | 0.35228  | 2.18601  | 2.92653  |
| C | -1.89808 | 6.81629  | -2.07248 |
| C | 1.35322  | 3.79284  | 1.42321  |
| C | -1.21631 | 5.18936  | -0.3818  |
| C | -1.75942 | 6.42457  | -0.73723 |
| C | -4.54596 | 1.97206  | -0.0988  |
| C | -1.47862 | 5.90839  | -3.05507 |
| C | -4.08676 | 2.86017  | 2.09668  |
| C | -5.00528 | 2.48663  | 1.11598  |
| C | 1.10658  | 2.70282  | 3.98058  |
| C | 2.1118   | 4.3031   | 2.47989  |
| C | 1.98812  | 3.76433  | 3.76077  |
| C | -2.45638 | 8.16977  | -2.44511 |
| H | -6.49684 | -6.15505 | -2.51471 |
| H | -7.06431 | -5.99279 | -0.84971 |
| H | -7.68637 | -4.91947 | -2.10973 |
| H | -5.74191 | -3.5031  | -3.39267 |
| H | -5.30941 | -5.13906 | 0.54975  |
| H | -3.4991  | -3.55953 | 1.0209   |
| H | -3.9041  | -1.93317 | -2.94257 |
| H | -2.83167 | 1.43379  | -1.27801 |
| H | -5.25242 | 1.6868   | -0.87301 |
| H | -6.07103 | 2.60242  | 1.29215  |
| H | -4.43275 | 3.27293  | 3.04033  |
| H | -2.02002 | 3.03074  | 2.63928  |
| H | -1.12205 | 4.93234  | 0.66601  |
| H | -2.08038 | 7.1001   | 0.05238  |
| H | -1.57852 | 6.17108  | -4.1058  |
| H | -0.64142 | 3.97892  | -3.5025  |
| H | -3.11357 | 8.10657  | -3.31895 |
| H | -3.0336  | 8.60348  | -1.62298 |
| H | -1.65845 | 8.88125  | -2.69411 |
| H | 3.32918  | 1.76469  | -0.07809 |
| H | 2.64834  | -2.93029 | -0.75325 |
| H | 2.02509  | 0.56139  | 1.74037  |
| H | 1.64435  | -1.97039 | 1.34653  |
| H | 2.30791  | 1.10667  | -2.32821 |
| H | 1.86233  | -1.43056 | -2.65796 |
| H | 1.45424  | 4.21539  | 0.42934  |
| H | 2.79933  | 5.12415  | 2.29793  |
| H | 2.57783  | 4.16303  | 4.58105  |
| H | 1.00935  | 2.27087  | 4.9727   |
| H | -0.31158 | 1.34596  | 3.10995  |
| H | 0.10309  | -1.77378 | 2.96425  |
| H | -3.08135 | -0.61426 | 5.59577  |

|    |          |          |          |
|----|----------|----------|----------|
| H  | -0.71421 | -1.29407 | 5.23254  |
| H  | -4.61515 | -0.41542 | 3.64609  |
| H  | -3.80147 | -0.91089 | 1.36739  |
| H  | -0.00685 | 2.49637  | -1.92192 |
| H  | -2.35421 | -1.08361 | -1.53018 |
| H  | -0.08741 | -3.32935 | -1.78653 |
| H  | 0.57659  | -7.16941 | 0.02788  |
| H  | -0.29244 | -6.29197 | 2.18553  |
| H  | -1.07308 | -3.96184 | 2.35572  |
| H  | 0.65551  | -5.68094 | -1.965   |
| Cl | -0.76126 | 0.15902  | -2.63724 |

**[Ir(SiNP){P(OMe)<sub>3</sub>}(tfbb)]<sup>+</sup> (3<sup>+</sup>)**

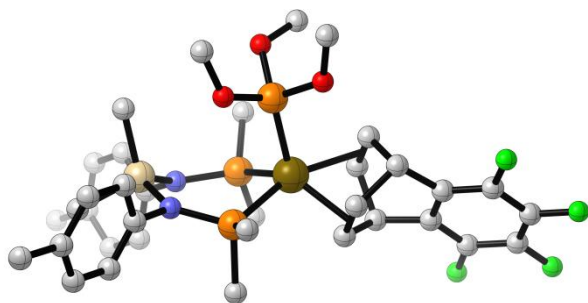

|   |          |          |          |
|---|----------|----------|----------|
| C | -3.61602 | -0.15731 | 2.28879  |
| H | -4.20544 | -1.07033 | 2.42299  |
| H | -4.22777 | 0.67652  | 2.65197  |
| H | -2.725   | -0.23469 | 2.9123   |
| C | -4.91049 | 0.29801  | -0.39284 |
| H | -4.83005 | 0.44514  | -1.47302 |
| H | -5.43902 | 1.16206  | 0.01924  |
| H | -5.52821 | -0.58723 | -0.21902 |
| C | -0.42253 | 2.87046  | 1.90163  |
| C | -1.28345 | 2.66646  | 2.99071  |
| H | -2.07338 | 1.9301   | 2.91923  |
| C | -1.14481 | 3.40286  | 4.16814  |
| H | -1.83656 | 3.23646  | 4.98896  |
| C | -0.12551 | 4.34846  | 4.29123  |
| H | -0.01891 | 4.92477  | 5.20522  |
| C | 0.75179  | 4.55208  | 3.22524  |
| H | 1.54394  | 5.29095  | 3.30262  |
| C | 0.60254  | 3.82422  | 2.04202  |
| H | 1.26787  | 4.04187  | 1.21333  |
| C | -0.17731 | 3.00476  | -0.97804 |
| C | 0.28033  | 2.49593  | -2.20331 |
| H | 0.42317  | 1.42895  | -2.31482 |
| C | 0.53616  | 3.34429  | -3.28204 |
| H | 0.88858  | 2.92829  | -4.2212  |
| C | 0.34128  | 4.71993  | -3.15108 |
| H | 0.54905  | 5.38307  | -3.98554 |
| C | -0.13077 | 5.23817  | -1.94418 |
| H | -0.30214 | 6.30518  | -1.83834 |
| C | -0.39822 | 4.38922  | -0.86994 |
| H | -0.79337 | 4.81155  | 0.04616  |
| C | -0.44344 | -3.3519  | -0.65232 |
| C | 0.37236  | -3.92072 | 0.337    |
| H | 0.84691  | -3.29396 | 1.07866  |
| C | 0.60797  | -5.29673 | 0.3661   |
| H | 1.25154  | -5.71353 | 1.13534  |
| C | 0.03131  | -6.13023 | -0.59127 |
| H | 0.21733  | -7.19988 | -0.56954 |
| C | -0.77918 | -5.57804 | -1.58435 |
| H | -1.23102 | -6.21491 | -2.33869 |
| C | -1.01073 | -4.20414 | -1.61867 |
| H | -1.64007 | -3.80166 | -2.40235 |
| C | -0.7605  | -1.22509 | -2.53905 |
| C | 0.18718  | -1.8465  | -3.37202 |

|   |          |          |          |
|---|----------|----------|----------|
| H | 0.88621  | -2.56772 | -2.9615  |
| C | 0.22112  | -1.57242 | -4.74065 |
| H | 0.95492  | -2.06868 | -5.36868 |
| C | -0.69276 | -0.67838 | -5.3018  |
| H | -0.67219 | -0.47446 | -6.36802 |
| C | -1.63911 | -0.0571  | -4.48555 |
| H | -2.35911 | 0.63393  | -4.91403 |
| C | -1.66822 | -0.32478 | -3.11554 |
| H | -2.40746 | 0.16372  | -2.4919  |
| C | -3.11988 | 2.73813  | -0.17834 |
| C | -3.74202 | 3.51776  | 0.80432  |
| H | -3.58504 | 3.29315  | 1.85231  |
| C | -4.56558 | 4.58665  | 0.44603  |
| H | -5.03737 | 5.17612  | 1.22793  |
| C | -4.79776 | 4.90999  | -0.89619 |
| C | -4.16558 | 4.12739  | -1.87319 |
| H | -4.31947 | 4.35775  | -2.92427 |
| C | -3.34235 | 3.05994  | -1.5241  |
| H | -2.85321 | 2.47686  | -2.29673 |
| C | -5.71688 | 6.04443  | -1.27995 |
| H | -6.74126 | 5.68444  | -1.43619 |
| H | -5.3967  | 6.52276  | -2.21012 |
| H | -5.75671 | 6.80958  | -0.49969 |
| C | -3.34102 | -2.44037 | -0.45868 |
| C | -4.03307 | -2.59593 | -1.66692 |
| H | -3.86626 | -1.89327 | -2.47566 |
| C | -4.92914 | -3.65092 | -1.83438 |
| H | -5.45486 | -3.75515 | -2.78011 |
| C | -5.16861 | -4.57508 | -0.80723 |
| C | -4.4679  | -4.41151 | 0.39499  |
| H | -4.62471 | -5.11944 | 1.20482  |
| C | -3.56701 | -3.3618  | 0.56988  |
| H | -3.00989 | -3.25806 | 1.49344  |
| C | -6.16701 | -5.69349 | -0.98348 |
| H | -5.92721 | -6.54931 | -0.34626 |
| H | -6.20232 | -6.03997 | -2.0204  |
| H | -7.17848 | -5.36232 | -0.71785 |
| C | 2.6032   | 1.28338  | 0.50264  |
| H | 2.32822  | 2.27118  | 0.84464  |
| C | 2.88258  | 0.23939  | 1.37175  |
| H | 2.86579  | 0.34541  | 2.44762  |
| C | 3.57355  | -0.95187 | 0.69645  |
| H | 3.78177  | -1.7591  | 1.39477  |
| C | 2.45955  | -1.29945 | -0.31015 |
| H | 2.34691  | -2.33287 | -0.61903 |
| C | 2.17625  | -0.20129 | -1.21077 |
| H | 1.83893  | -0.374   | -2.22565 |
| C | 3.06784  | 1.0225   | -0.93171 |
| H | 2.86682  | 1.85909  | -1.59706 |
| C | 4.52397  | 0.60817  | -0.92064 |
| C | 5.54225  | 1.15041  | -1.6881  |
| C | 6.84147  | 0.64418  | -1.59181 |
| C | 7.11332  | -0.41033 | -0.7209  |
| C | 6.08574  | -0.95766 | 0.05258  |
| C | 4.79777  | -0.45591 | -0.04322 |
| C | -1.50465 | -2.6072  | 3.90788  |
| H | -1.32654 | -1.94559 | 4.75647  |
| H | -1.05971 | -3.58901 | 4.08682  |
| H | -2.57909 | -2.72034 | 3.75744  |
| C | 1.04185  | 0.69372  | 4.47708  |

|    |          |          |          |
|----|----------|----------|----------|
| H  | 1.96234  | 0.14482  | 4.70162  |
| H  | 0.62144  | 1.0827   | 5.40478  |
| H  | 1.25589  | 1.53265  | 3.81085  |
| C  | 1.73385  | -2.70758 | 4.25625  |
| H  | 1.21314  | -2.20538 | 5.0755   |
| H  | 2.79794  | -2.77471 | 4.49069  |
| H  | 1.33156  | -3.71619 | 4.12697  |
| O  | -0.97377 | -2.04722 | 2.68735  |
| O  | 0.04752  | -0.1754  | 3.91377  |
| O  | 1.62327  | -1.97296 | 3.02228  |
| F  | 5.30414  | 2.16664  | -2.53519 |
| F  | 7.82555  | 1.16658  | -2.32759 |
| F  | 8.35585  | -0.89021 | -0.6291  |
| F  | 6.37247  | -1.97437 | 0.88421  |
| Si | -3.24664 | 0.09477  | 0.46049  |
| P  | -0.59811 | 1.81507  | 0.37924  |
| P  | -0.78169 | -1.52898 | -0.70888 |
| P  | 0.32154  | -1.07551 | 2.56053  |
| Ir | 0.77919  | -0.19362 | 0.44251  |
| N  | -2.30112 | 1.5828   | 0.16955  |
| N  | -2.42217 | -1.32992 | -0.24787 |

**Ir{PO(OMe)<sub>2</sub>}(HNP)<sub>2</sub>(tfbb) (4)**

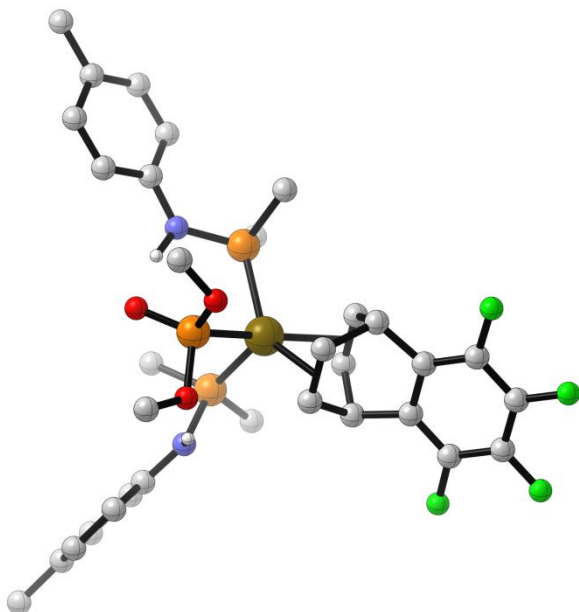

|    |          |          |          |
|----|----------|----------|----------|
| Ir | 0.4646   | -0.2704  | -0.4152  |
| C  | 2.63293  | -2.23169 | -0.47297 |
| P  | -0.13384 | 1.94328  | 0.40929  |
| P  | -1.35537 | -1.56524 | 0.45366  |
| P  | -0.62793 | 0.02996  | -2.43129 |
| C  | 2.07772  | -1.22288 | -1.49098 |
| C  | 1.8773   | -1.6941  | 0.74513  |
| C  | 2.42738  | 0.14403  | -1.17229 |
| C  | 3.24704  | 0.2288   | 0.13463  |
| C  | 2.2083   | -0.38798 | 1.08928  |
| O  | -2.11128 | 0.35904  | -2.5168  |
| O  | -0.34696 | -1.26581 | -3.44123 |
| O  | 0.24816  | 1.20491  | -3.23003 |
| C  | 4.11922  | -2.01623 | -0.28268 |
| C  | 6.78833  | -1.29382 | 0.08829  |
| C  | 5.77896  | -0.33747 | 0.22683  |
| C  | 4.4511   | -0.68785 | 0.04473  |
| N  | -2.85123 | -1.16193 | -0.24914 |
| N  | 0.29864  | 3.05089  | -0.82884 |
| F  | 6.1292   | 0.92469  | 0.54095  |
| F  | 8.07262  | -0.95611 | 0.26768  |
| F  | 4.83202  | -4.24126 | -0.73396 |
| F  | 7.42897  | -3.5233  | -0.36667 |
| C  | -1.16387 | -3.39802 | 0.22572  |
| C  | -1.57119 | -4.3647  | 1.15744  |
| C  | 5.12071  | -2.96326 | -0.42071 |
| C  | -0.62447 | -3.83006 | -0.9991  |
| C  | -1.43121 | -5.72653 | 0.87866  |

|   |          |          |          |
|---|----------|----------|----------|
| C | -0.89557 | -6.14284 | -0.3396  |
| C | 6.45915  | -2.60777 | -0.23614 |
| C | -0.49701 | -5.19021 | -1.28028 |
| C | -0.13485 | 1.54693  | -4.57013 |
| C | -1.4187  | -1.81294 | -4.22124 |
| C | -1.63342 | -1.36535 | 2.27512  |
| C | -0.8008  | -1.96891 | 3.234    |
| C | -2.64064 | -0.49366 | 2.71945  |
| C | -4.08084 | -1.85267 | -0.27991 |
| C | -4.54822 | -2.66492 | 0.7617   |
| C | -6.61624 | -3.1271  | -0.45434 |
| C | -4.9036  | -1.67843 | -1.40952 |
| C | -2.81106 | -0.2372  | 4.08145  |
| C | -6.14482 | -2.29934 | -1.4848  |
| C | -0.97213 | -1.71156 | 4.59515  |
| C | -1.97811 | -0.84274 | 5.02366  |
| C | -5.79243 | -3.29105 | 0.66264  |
| C | -7.95562 | -3.81824 | -0.55944 |
| C | -1.85827 | 2.45731  | 0.88274  |
| C | 0.87471  | 2.47456  | 1.86564  |
| C | -0.03235 | 4.41208  | -1.00961 |
| C | -0.0072  | 4.93445  | -2.31591 |
| C | -2.19666 | 3.02558  | 2.12066  |
| C | -2.86992 | 2.28506  | -0.07816 |
| C | 0.66512  | 1.88437  | 3.12599  |
| C | -0.61006 | 7.15361  | -1.51124 |
| C | 1.92765  | 3.38833  | 1.71735  |
| C | -0.34976 | 5.28371  | 0.04131  |
| C | -0.63676 | 6.62509  | -0.21774 |
| C | -4.18407 | 2.65909  | 0.20433  |
| C | -0.28569 | 6.27493  | -2.55521 |
| C | -3.51434 | 3.39398  | 2.4002   |
| C | -4.51365 | 3.20834  | 1.44486  |
| C | 1.47272  | 2.22426  | 4.21187  |
| C | 2.73982  | 3.72036  | 2.80537  |
| C | 2.51305  | 3.14421  | 4.05507  |
| C | -0.90594 | 8.61047  | -1.78007 |
| H | -7.93936 | -4.61874 | -1.30988 |
| H | -8.24697 | -4.2693  | 0.39377  |
| H | -8.74767 | -3.12044 | -0.85406 |
| H | -6.75958 | -2.14192 | -2.36857 |
| H | -6.13016 | -3.91632 | 1.48614  |
| H | -3.95928 | -2.79265 | 1.66109  |
| H | -4.55319 | -1.04638 | -2.22103 |
| H | -2.64066 | 1.85092  | -1.04679 |
| H | -4.95201 | 2.51482  | -0.55019 |
| H | -5.53877 | 3.49523  | 1.66216  |
| H | -3.75367 | 3.83506  | 3.36409  |
| H | -1.4361  | 3.19441  | 2.8736   |
| H | -0.37715 | 4.92592  | 1.06218  |
| H | -0.88537 | 7.27495  | 0.61812  |
| H | -0.25704 | 6.64425  | -3.57808 |
| H | 0.23225  | 4.27537  | -3.14597 |
| H | -1.66127 | 8.72998  | -2.56526 |
| H | -1.27781 | 9.11282  | -0.88232 |
| H | -0.01063 | 9.15071  | -2.11247 |
| H | 0.07395  | 0.71433  | -5.24975 |
| H | -1.19706 | 1.80584  | -4.61731 |
| H | 0.46806  | 2.40847  | -4.8665  |
| H | -0.95902 | -2.50776 | -4.92887 |

|   |          |          |          |
|---|----------|----------|----------|
| H | -2.12894 | -2.35653 | -3.58972 |
| H | -1.96409 | -1.03883 | -4.76707 |
| H | 3.5111   | 1.24859  | 0.40938  |
| H | 2.37244  | -3.26257 | -0.70678 |
| H | 1.98721  | 0.04824  | 2.05341  |
| H | 1.34651  | -2.3682  | 1.40297  |
| H | 2.57983  | 0.88483  | -1.94897 |
| H | 1.88858  | -1.54871 | -2.5068  |
| H | 2.1076   | 3.84161  | 0.74858  |
| H | 3.5495   | 4.43216  | 2.67196  |
| H | 3.14407  | 3.40429  | 4.89996  |
| H | 1.29168  | 1.76346  | 5.17884  |
| H | -0.12545 | 1.15141  | 3.26242  |
| H | -0.02663 | -2.66567 | 2.92983  |
| H | -2.11425 | -0.64493 | 6.08307  |
| H | -0.32336 | -2.19655 | 5.31915  |
| H | -3.59789 | 0.43962  | 4.4011   |
| H | -3.29178 | -0.01915 | 1.99384  |
| H | 0.48864  | 2.56428  | -1.70199 |
| H | -2.72179 | -0.53523 | -1.05472 |
| H | -0.30075 | -3.09332 | -1.72861 |
| H | -0.78843 | -7.20207 | -0.55544 |
| H | -1.74728 | -6.45998 | 1.61513  |
| H | -1.9922  | -4.06358 | 2.10988  |
| H | -0.08006 | -5.50577 | -2.23263 |

**[Ir(HNP)<sub>2</sub>{P(OMe)<sub>3</sub>}(tfbb)]<sup>+</sup> (5<sup>+</sup>)**

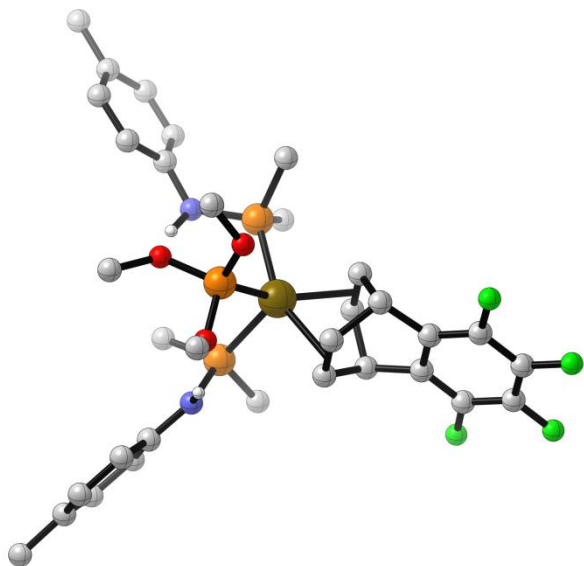

|    |          |          |          |
|----|----------|----------|----------|
| Ir | 0.48863  | -0.2634  | -0.45816 |
| C  | 2.98181  | -1.49254 | -1.3224  |
| P  | -0.2522  | 1.88495  | 0.48212  |
| P  | -1.13675 | -1.71    | 0.47032  |
| P  | -0.55298 | -0.04076 | -2.50186 |
| C  | 2.43592  | -0.10618 | -1.68168 |
| C  | 1.9836   | -1.80655 | -0.19525 |
| C  | 2.51508  | 0.81943  | -0.64201 |
| C  | 3.12568  | 0.22419  | 0.63662  |
| C  | 2.05691  | -0.85916 | 0.89455  |
| O  | -2.19078 | 0.12751  | -2.5246  |
| O  | -0.2652  | -1.20998 | -3.61106 |
| O  | -0.01257 | 1.31379  | -3.27613 |
| C  | 4.37652  | -1.35008 | -0.7552  |
| C  | 6.80826  | -0.89721 | 0.52954  |
| C  | 5.66371  | -0.20575 | 0.93718  |
| C  | 4.45201  | -0.42613 | 0.30182  |
| N  | -2.72411 | -1.11652 | 0.25585  |
| N  | -0.09723 | 3.06781  | -0.74457 |
| F  | 5.76501  | 0.67057  | 1.95076  |
| F  | 7.9769   | -0.68414 | 1.13845  |
| F  | 5.45882  | -2.92281 | -2.16895 |
| F  | 7.82779  | -2.46856 | -0.90809 |
| C  | -1.11483 | -3.44403 | -0.1632  |
| C  | -1.74088 | -4.47842 | 0.55601  |
| C  | 5.51031  | -2.03591 | -1.16018 |
| C  | -0.55885 | -3.73524 | -1.41882 |
| C  | -1.80777 | -5.76761 | 0.02721  |
| C  | -1.24884 | -6.04603 | -1.22093 |
| C  | 6.73208  | -1.81252 | -0.5197  |
| C  | -0.62358 | -5.02751 | -1.94165 |

|   |          |          |          |
|---|----------|----------|----------|
| C | 0.2012   | 1.44175  | -4.69841 |
| C | -1.20077 | -1.72604 | -4.57835 |
| C | -0.94172 | -1.92055 | 2.28707  |
| C | -0.03256 | -2.85483 | 2.8111   |
| C | -1.64521 | -1.08494 | 3.16883  |
| C | -3.95047 | -1.84777 | 0.33614  |
| C | -4.37754 | -2.46568 | 1.51763  |
| C | -6.45335 | -3.17888 | 0.44722  |
| C | -4.78749 | -1.90022 | -0.78754 |
| C | -1.45018 | -1.19127 | 4.54747  |
| C | -6.02094 | -2.54369 | -0.72498 |
| C | 0.16497  | -2.95203 | 4.18984  |
| C | -0.54363 | -2.1219  | 5.06051  |
| C | -5.60564 | -3.1261  | 1.56019  |
| C | -7.77435 | -3.90833 | 0.49983  |
| C | -1.9547  | 2.18053  | 1.1465   |
| C | 0.87086  | 2.44105  | 1.83577  |
| C | -0.58596 | 4.39862  | -0.83097 |
| C | -0.70081 | 4.97602  | -2.10628 |
| C | -2.23554 | 2.37625  | 2.5063   |
| C | -3.01399 | 2.23698  | 0.22597  |
| C | 0.97521  | 1.68216  | 3.01505  |
| C | -1.50273 | 7.06883  | -1.15073 |
| C | 1.7013   | 3.56011  | 1.67397  |
| C | -0.93941 | 5.17023  | 0.28304  |
| C | -1.39292 | 6.47908  | 0.11297  |
| C | -4.3205  | 2.46282  | 0.65369  |
| C | -1.14588 | 6.28568  | -2.25733 |
| C | -3.54719 | 2.59857  | 2.9342   |
| C | -4.59262 | 2.6377   | 2.01232  |
| C | 1.87081  | 2.05254  | 4.01839  |
| C | 2.60545  | 3.92028  | 2.67662  |
| C | 2.69024  | 3.17188  | 3.85101  |
| C | -1.96179 | 8.49764  | -1.31842 |
| H | -7.6788  | -4.93124 | 0.11495  |
| H | -8.15105 | -3.9801  | 1.524    |
| H | -8.5348  | -3.4055  | -0.10525 |
| H | -6.65546 | -2.56061 | -1.60769 |
| H | -5.9176  | -3.59464 | 2.49016  |
| H | -3.76716 | -2.41256 | 2.41114  |
| H | -4.46397 | -1.433   | -1.71379 |
| H | -2.81185 | 2.12447  | -0.83392 |
| H | -5.12641 | 2.51144  | -0.07258 |
| H | -5.61005 | 2.81525  | 2.34685  |
| H | -3.7459  | 2.75469  | 3.99045  |
| H | -1.43617 | 2.3774   | 3.23784  |
| H | -0.86733 | 4.76149  | 1.28316  |
| H | -1.66422 | 7.05424  | 0.9945   |
| H | -1.22011 | 6.7057   | -3.25749 |
| H | -0.4333  | 4.39228  | -2.98438 |
| H | -2.60484 | 8.61242  | -2.19678 |
| H | -2.52127 | 8.84267  | -0.44448 |
| H | -1.11072 | 9.17706  | -1.45075 |
| H | 0.71369  | 0.56116  | -5.09121 |
| H | -0.74631 | 1.587    | -5.22525 |
| H | 0.82707  | 2.32413  | -4.83778 |
| H | -0.77708 | -2.66169 | -4.9445  |
| H | -2.16995 | -1.92175 | -4.11453 |
| H | -1.31913 | -1.03424 | -5.41844 |
| H | 3.19909  | 0.94865  | 1.44312  |

|   |          |          |          |
|---|----------|----------|----------|
| H | 2.92108  | -2.19511 | -2.15236 |
| H | 1.82278  | -1.13908 | 1.91518  |
| H | 1.67352  | -2.83506 | -0.04932 |
| H | 2.42859  | 1.88849  | -0.79272 |
| H | 2.27315  | 0.18443  | -2.71175 |
| H | 1.64429  | 4.1514   | 0.76706  |
| H | 3.24244  | 4.78839  | 2.53638  |
| H | 3.39375  | 3.45382  | 4.62831  |
| H | 1.93617  | 1.45935  | 4.92568  |
| H | 0.36813  | 0.79266  | 3.15087  |
| H | 0.50733  | -3.52469 | 2.14958  |
| H | -0.39627 | -2.20579 | 6.13298  |
| H | 0.86444  | -3.68413 | 4.58189  |
| H | -2.01218 | -0.55009 | 5.22017  |
| H | -2.35407 | -0.36601 | 2.77275  |
| H | 0.12672  | 2.66941  | -1.64923 |
| H | -2.73829 | -0.43753 | -0.49769 |
| H | -0.06732 | -2.94953 | -1.97992 |
| H | -1.29584 | -7.0522  | -1.62653 |
| H | -2.29428 | -6.55475 | 0.5951   |
| H | -2.17298 | -4.28642 | 1.53072  |
| H | -0.17734 | -5.24051 | -2.90882 |
| C | -2.93702 | 0.95492  | -3.4421  |
| H | -2.92334 | 0.53796  | -4.45284 |
| H | -3.96476 | 0.96616  | -3.0768  |
| H | -2.54019 | 1.97287  | -3.45103 |

**Ir{PO(OMe)<sub>2</sub>}(SiNP)(tfbb) (3-Me)**

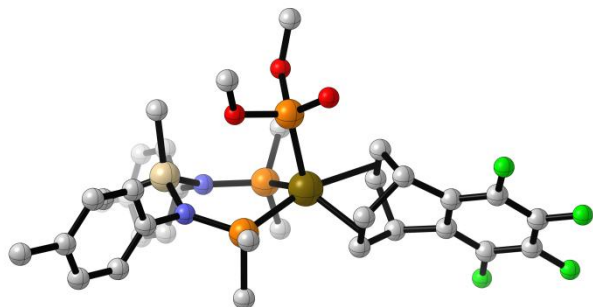

|   |          |          |          |
|---|----------|----------|----------|
| C | 3.31795  | -0.07951 | -2.53353 |
| H | 3.88226  | -0.98715 | -2.77116 |
| H | 3.89283  | 0.77405  | -2.91392 |
| H | 2.36294  | -0.13598 | -3.0547  |
| C | 4.90017  | 0.28115  | -0.00271 |
| H | 4.94217  | 0.39641  | 1.08381  |
| H | 5.38752  | 1.15273  | -0.44908 |
| H | 5.48476  | -0.6038  | -0.2698  |
| C | 0.21637  | 3.00569  | -1.67501 |
| C | 0.85668  | 2.81144  | -2.90875 |
| H | 1.55911  | 1.99722  | -3.0261  |
| C | 0.58523  | 3.63976  | -3.99741 |
| H | 1.10295  | 3.47408  | -4.93814 |
| C | -0.35246 | 4.66821  | -3.88526 |
| H | -0.56675 | 5.31011  | -4.735   |
| C | -1.01335 | 4.86226  | -2.67309 |
| H | -1.74533 | 5.65836  | -2.5696  |
| C | -0.72903 | 4.04156  | -1.57852 |
| H | -1.23663 | 4.23287  | -0.63904 |
| C | 0.23152  | 2.88262  | 1.2055   |
| C | -0.31122 | 2.30368  | 2.36117  |
| H | -0.57832 | 1.25463  | 2.34314  |
| C | -0.51127 | 3.05767  | 3.52004  |
| H | -0.93133 | 2.58343  | 4.40238  |
| C | -0.17643 | 4.41136  | 3.54004  |
| H | -0.33985 | 5.00292  | 4.43664  |
| C | 0.37164  | 5.00207  | 2.3997   |
| H | 0.64376  | 6.05382  | 2.40638  |
| C | 0.58111  | 4.2451   | 1.2469   |
| H | 1.01988  | 4.72235  | 0.37843  |
| C | 0.46216  | -3.36888 | 0.54234  |
| C | -0.37426 | -3.91582 | -0.44343 |
| H | -0.86099 | -3.28206 | -1.17354 |
| C | -0.60547 | -5.29275 | -0.49418 |
| H | -1.26085 | -5.69081 | -1.26338 |
| C | -0.00829 | -6.14567 | 0.43303  |
| H | -0.19219 | -7.21574 | 0.39133  |
| C | 0.82235  | -5.61373 | 1.42062  |
| H | 1.29239  | -6.26548 | 2.15159  |
| C | 1.05167  | -4.23991 | 1.4772   |
| H | 1.6967   | -3.85031 | 2.25525  |
| C | 0.82205  | -1.29761 | 2.47675  |

|   |          |          |          |
|---|----------|----------|----------|
| C | -0.13288 | -1.90766 | 3.30904  |
| H | -0.85738 | -2.59794 | 2.88926  |
| C | -0.14424 | -1.6617  | 4.68321  |
| H | -0.88667 | -2.14884 | 5.30904  |
| C | 0.80085  | -0.80598 | 5.25286  |
| H | 0.79653  | -0.62168 | 6.32329  |
| C | 1.75503  | -0.19583 | 4.4376   |
| H | 2.49716  | 0.46914  | 4.87053  |
| C | 1.76091  | -0.43651 | 3.06228  |
| H | 2.50379  | 0.0438   | 2.43554  |
| C | 3.10931  | 2.73364  | 0.04926  |
| C | 3.57633  | 3.576    | -0.96814 |
| H | 3.26642  | 3.39976  | -1.99125 |
| C | 4.42754  | 4.64266  | -0.6734  |
| H | 4.77419  | 5.28259  | -1.4813  |
| C | 4.84562  | 4.90044  | 0.63748  |
| C | 4.37168  | 4.05585  | 1.65102  |
| H | 4.67146  | 4.23528  | 2.68078  |
| C | 3.51818  | 2.99302  | 1.36516  |
| H | 3.14862  | 2.3597   | 2.1646   |
| C | 5.79669  | 6.03244  | 0.94689  |
| H | 6.8377   | 5.68526  | 0.95359  |
| H | 5.59553  | 6.46798  | 1.93056  |
| H | 5.72533  | 6.83032  | 0.20186  |
| C | 3.35531  | -2.41109 | 0.29225  |
| C | 4.09225  | -2.60489 | 1.46629  |
| H | 3.94639  | -1.93594 | 2.30705  |
| C | 5.00817  | -3.65435 | 1.55923  |
| H | 5.56999  | -3.7889  | 2.48047  |
| C | 5.22182  | -4.53143 | 0.48915  |
| C | 4.47956  | -4.32688 | -0.683   |
| H | 4.61954  | -4.99658 | -1.5285  |
| C | 3.55884  | -3.28665 | -0.78301 |
| H | 2.97117  | -3.13998 | -1.68144 |
| C | 6.22465  | -5.65716 | 0.5834   |
| H | 5.77657  | -6.61606 | 0.30042  |
| H | 6.61974  | -5.75752 | 1.5981   |
| H | 7.07505  | -5.49035 | -0.08868 |
| C | -2.61054 | 1.26647  | -0.47678 |
| H | -2.33134 | 2.27566  | -0.74646 |
| C | -2.8118  | 0.27101  | -1.42219 |
| H | -2.70191 | 0.42423  | -2.48743 |
| C | -3.52931 | -0.96339 | -0.85913 |
| H | -3.65715 | -1.73087 | -1.61806 |
| C | -2.48153 | -1.34766 | 0.20736  |
| H | -2.38085 | -2.39612 | 0.46736  |
| C | -2.27576 | -0.29665 | 1.18769  |
| H | -2.01171 | -0.52282 | 2.21544  |
| C | -3.16987 | 0.92648  | 0.90761  |
| H | -3.03132 | 1.73344  | 1.62519  |
| C | -4.61538 | 0.49419  | 0.7736   |
| C | -5.69376 | 0.97756  | 1.4963   |
| C | -6.97358 | 0.4584   | 1.28807  |
| C | -7.16592 | -0.55188 | 0.34878  |
| C | -6.07926 | -1.04131 | -0.38117 |
| C | -4.80878 | -0.52657 | -0.17758 |
| C | 1.01834  | -3.07293 | -3.70421 |
| H | 1.61144  | -2.69965 | -4.54889 |
| H | 0.01948  | -3.35061 | -4.05069 |
| H | 1.51453  | -3.95547 | -3.28693 |

|    |          |          |          |
|----|----------|----------|----------|
| C  | -0.3815  | -0.10114 | -5.062   |
| H  | -1.29265 | -0.69224 | -5.1899  |
| H  | 0.44837  | -0.60826 | -5.57152 |
| H  | -0.51349 | 0.89038  | -5.50541 |
| O  | 0.9403   | -2.08127 | -2.67484 |
| O  | -0.09034 | 0.09072  | -3.67469 |
| O  | -1.59015 | -1.94556 | -3.12529 |
| F  | -5.53655 | 1.9535   | 2.4134   |
| F  | -8.0189  | 0.92775  | 1.98449  |
| F  | -8.39573 | -1.04653 | 0.14909  |
| F  | -6.30026 | -2.01852 | -1.27952 |
| Si | 3.14321  | 0.10657  | -0.67145 |
| P  | 0.53263  | 1.80409  | -0.28584 |
| P  | 0.78245  | -1.54011 | 0.63318  |
| P  | -0.44063 | -1.12439 | -2.5736  |
| Ir | -0.78822 | -0.18591 | -0.39807 |
| N  | 2.25974  | 1.59639  | -0.24001 |
| N  | 2.42189  | -1.309   | 0.15472  |

TS\_5<sup>+</sup>\_4

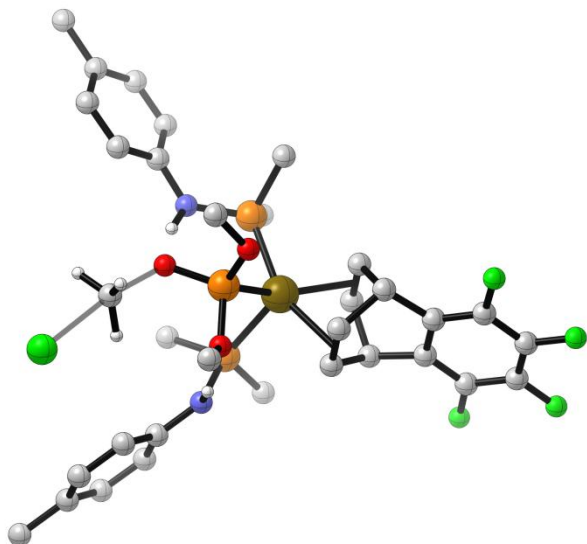

|    |          |          |          |
|----|----------|----------|----------|
| Ir | 0.66762  | -0.17464 | -0.35788 |
| C  | 3.23784  | -0.8448  | -1.54633 |
| P  | -0.41583 | 1.69988  | 0.78278  |
| P  | -0.50273 | -1.98731 | 0.58813  |
| P  | -0.71577 | -0.09051 | -2.23773 |
| C  | 2.33274  | 0.36233  | -1.81553 |
| C  | 2.48861  | -1.34962 | -0.30356 |
| C  | 2.33425  | 1.31122  | -0.78623 |
| C  | 3.23484  | 0.90016  | 0.39234  |
| C  | 2.49086  | -0.39628 | 0.78223  |
| O  | -2.27682 | -0.27607 | -2.07392 |
| O  | -0.26478 | -1.10747 | -3.46191 |
| O  | -0.45708 | 1.3955   | -2.92415 |
| C  | 4.62366  | -0.37268 | -1.16671 |
| C  | 7.03229  | 0.65565  | -0.20954 |
| C  | 5.82205  | 1.07449  | 0.34947  |
| C  | 4.62074  | 0.56831  | -0.12075 |
| N  | -2.18442 | -1.89687 | 0.33851  |
| N  | -0.71537 | 2.95451  | -0.34902 |
| F  | 5.85399  | 1.97444  | 1.34975  |
| F  | 8.19294  | 1.14609  | 0.24307  |
| F  | 5.85272  | -1.68932 | -2.72009 |
| F  | 8.19519  | -0.67432 | -1.77933 |
| C  | 0.01412  | -3.65719 | -0.02639 |
| C  | -0.03215 | -4.80819 | 0.77621  |
| C  | 5.82387  | -0.78866 | -1.71998 |
| C  | 0.36323  | -3.7929  | -1.38101 |
| C  | 0.27136  | -6.06122 | 0.23962  |
| C  | 0.61799  | -6.184   | -1.10536 |
| C  | 7.03378  | -0.27665 | -1.24507 |
| C  | 0.6613   | -5.04638 | -1.91445 |
| C  | -0.60629 | 1.73668  | -4.3233  |

|   |          |          |          |
|---|----------|----------|----------|
| C | -1.20492 | -1.75805 | -4.33577 |
| C | -0.28356 | -2.10012 | 2.41415  |
| C | 0.90686  | -2.60076 | 2.97009  |
| C | -1.27042 | -1.58879 | 3.27057  |
| C | -3.16507 | -2.9186  | 0.43444  |
| C | -3.2167  | -3.83875 | 1.48891  |
| C | -5.23066 | -4.86379 | 0.5622   |
| C | -4.16363 | -2.97793 | -0.55298 |
| C | -1.07189 | -1.58361 | 4.65299  |
| C | -5.17774 | -3.92681 | -0.48006 |
| C | 1.10215  | -2.59184 | 4.35192  |
| C | 0.11317  | -2.0819  | 5.19674  |
| C | -4.23203 | -4.7955  | 1.53841  |
| C | -6.31712 | -5.91187 | 0.61422  |
| C | -2.0129  | 1.55202  | 1.70603  |
| C | 0.73545  | 2.44488  | 2.01933  |
| C | -1.65862 | 4.01893  | -0.26643 |
| C | -2.38706 | 4.36231  | -1.4173  |
| C | -2.14962 | 1.81093  | 3.07746  |
| C | -3.15658 | 1.20416  | 0.96814  |
| C | 1.14373  | 1.69744  | 3.13806  |
| C | -3.5505  | 6.1331   | -0.21809 |
| C | 1.29188  | 3.71528  | 1.81453  |
| C | -1.88451 | 4.74609  | 0.90823  |
| C | -2.82103 | 5.7817   | 0.92196  |
| C | -4.40035 | 1.10259  | 1.58859  |
| C | -3.31212 | 5.40013  | -1.3897  |
| C | -3.39569 | 1.70166  | 3.69902  |
| C | -4.52256 | 1.3442   | 2.95876  |
| C | 2.06957  | 2.22145  | 4.03995  |
| C | 2.22826  | 4.23274  | 2.71397  |
| C | 2.61728  | 3.49003  | 3.82893  |
| C | -4.55559 | 7.2605   | -0.19819 |
| H | -6.13762 | -6.71269 | -0.11424 |
| H | -6.37644 | -6.37655 | 1.60274  |
| H | -7.29897 | -5.48439 | 0.3848   |
| H | -5.94043 | -3.94319 | -1.2551  |
| H | -4.24997 | -5.49738 | 2.3689   |
| H | -2.48641 | -3.79653 | 2.28729  |
| H | -4.13682 | -2.2713  | -1.37751 |
| H | -3.07857 | 1.02079  | -0.09772 |
| H | -5.27369 | 0.83907  | 0.99978  |
| H | -5.49203 | 1.26504  | 3.44203  |
| H | -3.48386 | 1.91041  | 4.76163  |
| H | -1.29139 | 2.11056  | 3.66701  |
| H | -1.33973 | 4.50927  | 1.81433  |
| H | -2.9834  | 6.32737  | 1.84855  |
| H | -3.87298 | 5.61768  | -2.29476 |
| H | -2.24724 | 3.8086   | -2.34135 |
| H | -5.51083 | 6.95092  | -0.63578 |
| H | -4.7489  | 7.60539  | 0.82187  |
| H | -4.20319 | 8.12308  | -0.77721 |
| H | -0.26604 | 0.91004  | -4.95133 |
| H | -1.64246 | 1.99934  | -4.55658 |
| H | 0.03494  | 2.60344  | -4.4962  |
| H | -0.69555 | -2.63225 | -4.74618 |
| H | -2.09613 | -2.07245 | -3.78826 |
| H | -1.49952 | -1.09708 | -5.15769 |
| H | 3.24683  | 1.63905  | 1.18927  |
| H | 3.23485  | -1.56209 | -2.36581 |

|    |          |          |          |
|----|----------|----------|----------|
| H  | 2.4726   | -0.70217 | 1.82211  |
| H  | 2.42084  | -2.41884 | -0.13895 |
| H  | 2.00702  | 2.33435  | -0.92587 |
| H  | 1.96843  | 0.57605  | -2.81158 |
| H  | 0.99217  | 4.29616  | 0.9487   |
| H  | 2.65178  | 5.21769  | 2.53997  |
| H  | 3.34552  | 3.89263  | 4.52675  |
| H  | 2.3703   | 1.63426  | 4.90295  |
| H  | 0.7458   | 0.70078  | 3.3031   |
| H  | 1.67691  | -3.01761 | 2.32845  |
| H  | 0.26409  | -2.07944 | 6.27233  |
| H  | 2.02345  | -2.98987 | 4.76731  |
| H  | -1.84805 | -1.18868 | 5.30171  |
| H  | -2.1933  | -1.20243 | 2.85299  |
| H  | -0.58279 | 2.62757  | -1.30298 |
| H  | -2.39034 | -1.23304 | -0.40992 |
| H  | 0.41065  | -2.91205 | -2.01289 |
| H  | 0.85515  | -7.15909 | -1.52093 |
| H  | 0.23367  | -6.9402  | 0.8765   |
| H  | -0.29576 | -4.73499 | 1.82448  |
| H  | 0.93456  | -5.1332  | -2.96222 |
| C  | -3.40382 | 0.73802  | -3.02284 |
| H  | -4.33005 | 0.37043  | -2.60846 |
| H  | -3.05456 | 1.69208  | -2.67935 |
| H  | -3.14883 | 0.40424  | -4.0115  |
| Cl | -4.66611 | 2.36918  | -4.46319 |

TS\_3<sup>+</sup>\_3-Me

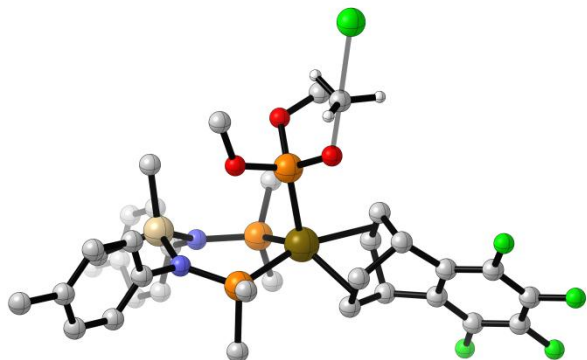

|   |          |          |          |
|---|----------|----------|----------|
| C | 3.29695  | 1.16933  | 2.30108  |
| H | 3.69911  | 2.18607  | 2.24212  |
| H | 3.98563  | 0.58364  | 2.92184  |
| H | 2.32732  | 1.22148  | 2.79525  |
| C | 5.01052  | 0.26463  | -0.00066 |
| H | 5.10678  | -0.1716  | -0.99858 |
| H | 5.58555  | -0.3581  | 0.69046  |
| H | 5.47112  | 1.25617  | -0.02076 |
| C | 0.66225  | -2.35652 | 2.48102  |
| C | 1.31606  | -1.7295  | 3.55248  |
| H | 1.97559  | -0.89285 | 3.36329  |
| C | 1.12531  | -2.16175 | 4.86531  |
| H | 1.65184  | -1.66382 | 5.6745   |
| C | 0.25683  | -3.21935 | 5.13978  |
| H | 0.10617  | -3.55414 | 6.16181  |
| C | -0.41684 | -3.84223 | 4.08885  |
| H | -1.09327 | -4.66892 | 4.28612  |
| C | -0.21354 | -3.41764 | 2.77356  |
| H | -0.71824 | -3.9484  | 1.97327  |
| C | 0.80625  | -3.2463  | -0.26177 |
| C | 0.38439  | -3.15852 | -1.59646 |
| H | 0.066    | -2.19952 | -1.9845  |
| C | 0.37522  | -4.28336 | -2.42391 |
| H | 0.04499  | -4.18919 | -3.45438 |
| C | 0.78358  | -5.52094 | -1.92574 |
| H | 0.76722  | -6.39997 | -2.5638  |
| C | 1.21806  | -5.62186 | -0.60301 |
| H | 1.55047  | -6.57796 | -0.20903 |
| C | 1.23891  | -4.49484 | 0.21899  |
| H | 1.60286  | -4.59284 | 1.23499  |
| C | 0.15623  | 2.94064  | -1.63871 |
| C | -0.82706 | 3.60659  | -0.8911  |
| H | -1.28785 | 3.13182  | -0.03569 |
| C | -1.24223 | 4.89241  | -1.24547 |
| H | -2.00677 | 5.3862   | -0.65306 |
| C | -0.68372 | 5.53471  | -2.34959 |
| H | -1.00851 | 6.53468  | -2.62249 |
| C | 0.2914   | 4.88151  | -3.10535 |
| H | 0.73317  | 5.36945  | -3.96927 |
| C | 0.70463  | 3.59699  | -2.75688 |

|   |          |          |          |
|---|----------|----------|----------|
| H | 1.46274  | 3.11117  | -3.35884 |
| C | 0.94451  | 0.48153  | -2.87125 |
| C | 0.01057  | 0.71186  | -3.89618 |
| H | -0.81387 | 1.39875  | -3.73651 |
| C | 0.14379  | 0.08691  | -5.13771 |
| H | -0.58541 | 0.28481  | -5.91803 |
| C | 1.21333  | -0.77715 | -5.37931 |
| H | 1.32056  | -1.2566  | -6.34787 |
| C | 2.14809  | -1.01317 | -4.36998 |
| H | 2.9876   | -1.67899 | -4.549   |
| C | 2.01116  | -0.39202 | -3.12715 |
| H | 2.74289  | -0.57949 | -2.3497  |
| C | 3.55384  | -2.30225 | 0.67703  |
| C | 4.12814  | -2.71873 | 1.88405  |
| H | 3.79557  | -2.27908 | 2.81664  |
| C | 5.1222   | -3.69991 | 1.89704  |
| H | 5.55214  | -4.00511 | 2.84779  |
| C | 5.57678  | -4.2923  | 0.71381  |
| C | 4.99266  | -3.87406 | -0.49075 |
| H | 5.31771  | -4.32152 | -1.42694 |
| C | 4.00027  | -2.89823 | -0.51146 |
| H | 3.54968  | -2.60108 | -1.4523  |
| C | 6.67396  | -5.32997 | 0.72605  |
| H | 7.63785  | -4.89059 | 0.4406   |
| H | 6.4679   | -6.13975 | 0.01867  |
| H | 6.79705  | -5.77118 | 1.71905  |
| C | 3.13116  | 2.54456  | -1.05955 |
| C | 3.93953  | 2.46398  | -2.20092 |
| H | 3.96824  | 1.54369  | -2.77352 |
| C | 4.69925  | 3.56136  | -2.60546 |
| H | 5.31736  | 3.47957  | -3.49634 |
| C | 4.68302  | 4.76417  | -1.88623 |
| C | 3.869    | 4.83462  | -0.74808 |
| H | 3.82546  | 5.75885  | -0.17733 |
| C | 3.10341  | 3.74411  | -0.33844 |
| H | 2.45322  | 3.8149   | 0.52516  |
| C | 5.5328   | 5.93808  | -2.3111  |
| H | 5.06996  | 6.88908  | -2.03155 |
| H | 5.69585  | 5.9444   | -3.39295 |
| H | 6.52024  | 5.90501  | -1.83373 |
| C | -2.34798 | -1.65088 | 0.51095  |
| H | -1.99413 | -2.46122 | 1.13298  |
| C | -2.82976 | -0.46034 | 1.03672  |
| H | -2.89844 | -0.2583  | 2.09618  |
| C | -3.60117 | 0.39121  | 0.02244  |
| H | -3.9605  | 1.31926  | 0.46004  |
| C | -2.45166 | 0.60583  | -0.98227 |
| H | -2.44121 | 1.52441  | -1.55896 |
| C | -1.95778 | -0.6448  | -1.52928 |
| H | -1.56648 | -0.70663 | -2.53838 |
| C | -2.71587 | -1.85946 | -0.96091 |
| H | -2.35731 | -2.80903 | -1.35346 |
| C | -4.20751 | -1.66925 | -1.13981 |
| C | -5.08147 | -2.53663 | -1.77469 |
| C | -6.43504 | -2.21232 | -1.89278 |
| C | -6.90836 | -1.01044 | -1.37048 |
| C | -6.02807 | -0.1338  | -0.73005 |
| C | -4.68498 | -0.45504 | -0.61189 |
| C | 0.73998  | 3.65878  | 2.83421  |
| H | 0.65183  | 3.26886  | 3.85014  |

|    |          |          |          |
|----|----------|----------|----------|
| H  | 0.01992  | 4.46602  | 2.68406  |
| H  | 1.75116  | 4.04296  | 2.68442  |
| C  | -1.3004  | 0.34703  | 4.31607  |
| H  | -2.24904 | 0.89087  | 4.29895  |
| H  | -0.91368 | 0.34221  | 5.33695  |
| H  | -1.45629 | -0.68967 | 3.99834  |
| C  | -2.50999 | 3.49196  | 3.31354  |
| H  | -2.37366 | 4.36843  | 2.7047   |
| O  | 0.54931  | 2.61306  | 1.8593   |
| O  | -0.31531 | 0.99066  | 3.50195  |
| O  | -2.04124 | 2.27884  | 2.09164  |
| F  | -4.65052 | -3.70448 | -2.29022 |
| F  | -7.28207 | -3.05062 | -2.5036  |
| F  | -8.20619 | -0.7043  | -1.48451 |
| F  | -6.51338 | 1.01854  | -0.2376  |
| Si | 3.22407  | 0.40266  | 0.58688  |
| P  | 0.87406  | -1.68955 | 0.75522  |
| P  | 0.7354   | 1.23565  | -1.18474 |
| P  | -0.67314 | 1.52362  | 1.96903  |
| Ir | -0.73368 | -0.01022 | 0.14173  |
| N  | 2.55163  | -1.25192 | 0.63296  |
| N  | 2.3478   | 1.40838  | -0.60548 |
| H  | -3.51806 | 3.14153  | 3.45799  |
| H  | -1.79422 | 3.29363  | 4.09045  |
